# Supplementary material
Source: Springer Nature journal article supplement (https://www.springermedizin.de/resource/supplementary/12961_2008_74_MOESM5_ESM.pdf/9571378)
Supplement: MOESM5 [file 9571378]

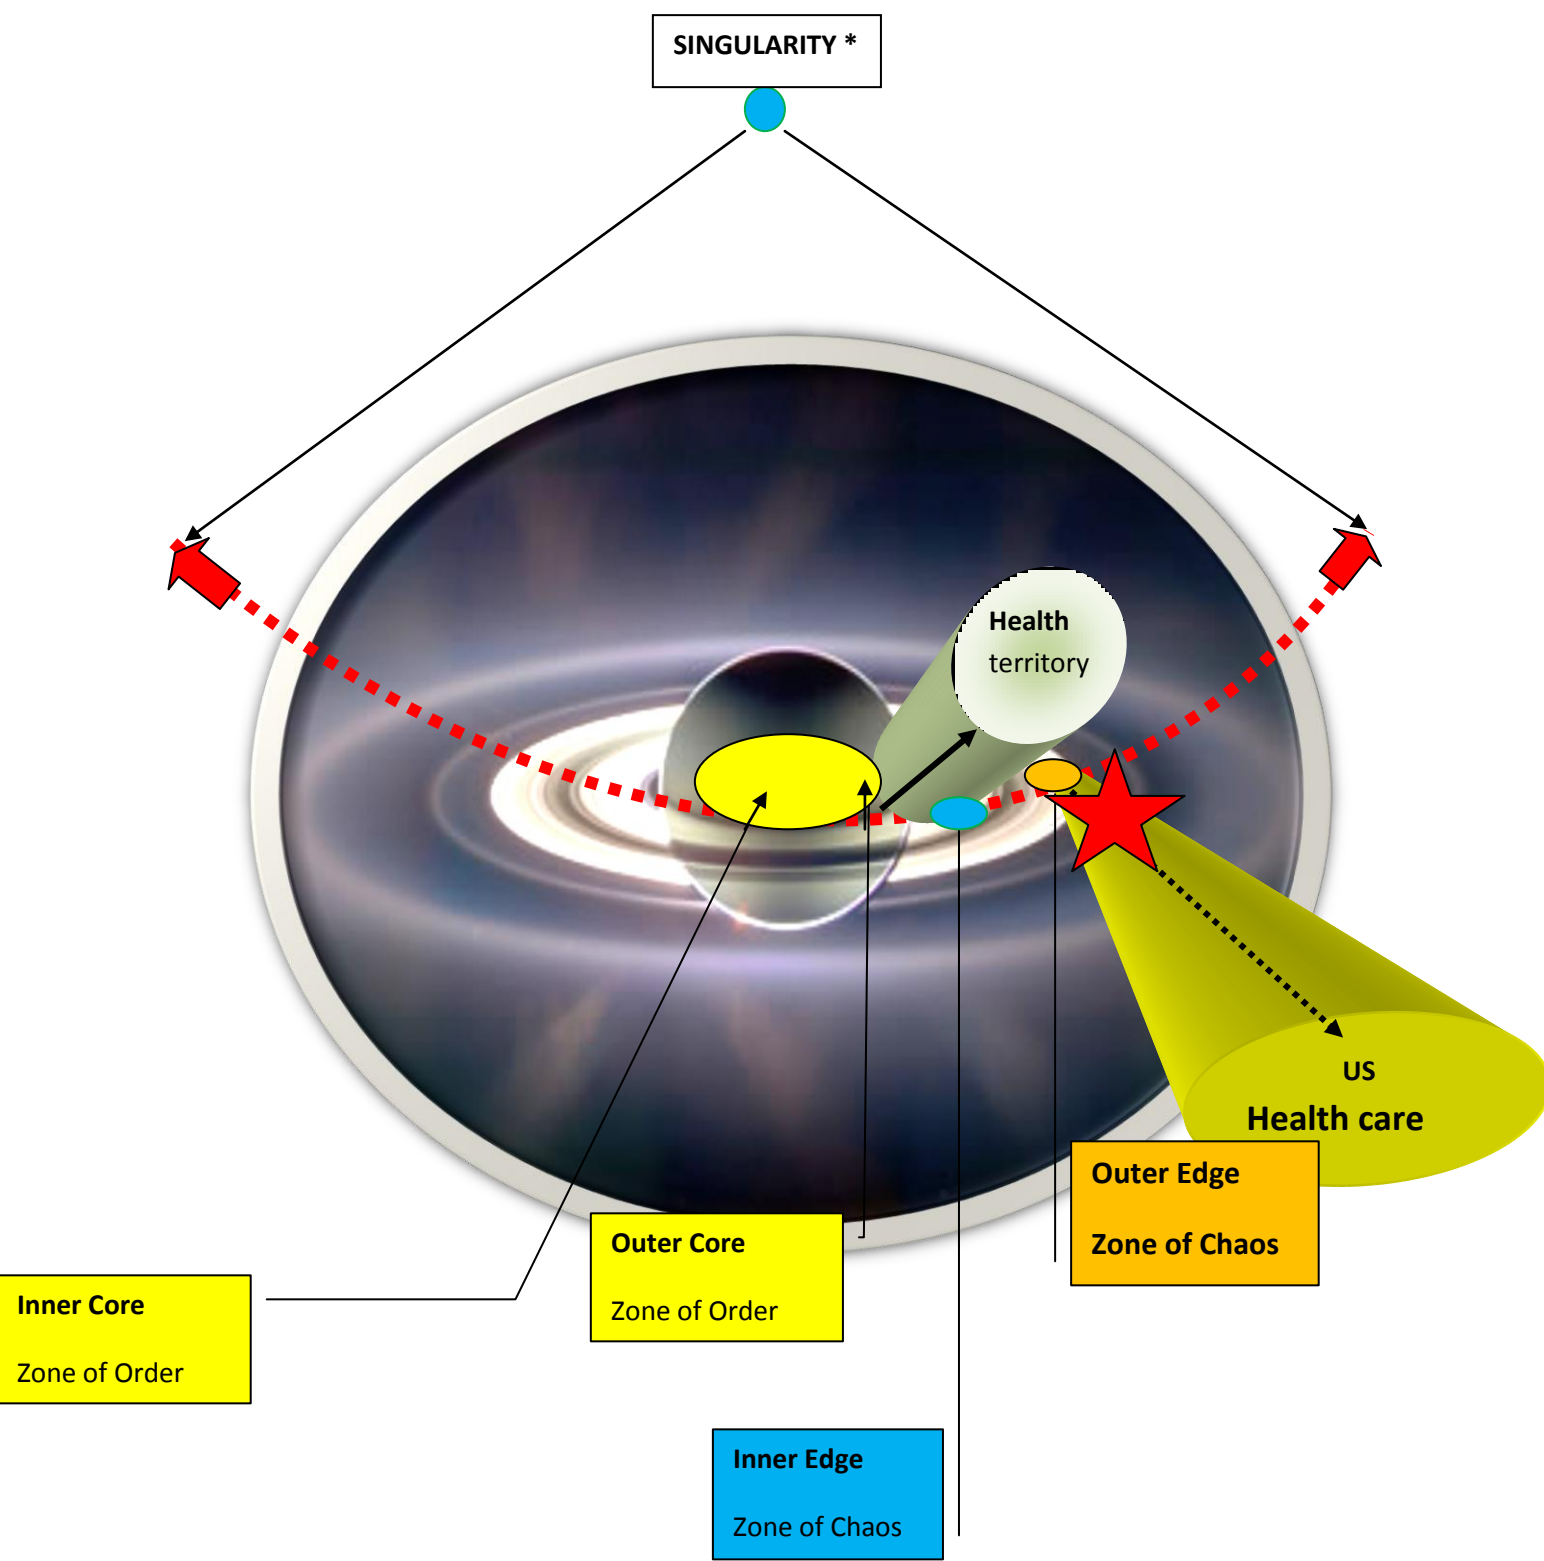

Planet Saturn adopted from [www.nature.com/.../061009/full/061009-11.html](http://www.nature.com/.../061009/full/061009-11.html)

Figure 4: Location of U.S. health care within the dynamic system's model: Zone of Chaos, Outer Edge

\* a point where no pendulum/system oscillation exists
